# Supplementary material for: Platinum@regular indium oxide nanooctahedra as difunctional counter electrodes for dye-sensitized solar cells
Source: Royal Society of Chemistry journal article supplement (doi:10.1039/c3ta14796g), 2014-01-01
Supplement: c3ta14796g1.pdf [file c3ta14796g1.pdf]

## Supporting Information

---

### **Platinum@Regular Indium Oxide Nanooctahedrons as Difunctional Counter Electrode for Dye-Sensitized Solar Cells †**

*Bo Zhang,<sup>\*a,b</sup> Yu Hang Li,<sup>a</sup> Ju Hua Zhong,<sup>b</sup> Hai Min Zhang,<sup>c</sup> Hui Jun Zhao<sup>c</sup> and Hua  
Gui Yang<sup>\*a,c</sup>*

<sup>a</sup> Key Laboratory for Ultrafine Materials of Ministry of Education, School of Materials Science and Engineering, East China University of Science and Technology, 130 Meilong Road, Shanghai 200237, China.

<sup>b</sup> Department of Physics, East China University of Science and Technology, 130 Meilong Road, Shanghai 200237, China.

<sup>c</sup> Centre for Clean Environment and Energy, Gold Coast Campus, Griffith University, Queensland 4222, Australia.

Correspondence and requests for materials should be addressed to H.G.Yang or B. Zhang(email: [hgyang@ecust.edu.cn](mailto:hgyang@ecust.edu.cn) or [bo.zhang@ecust.edu.cn](mailto:bo.zhang@ecust.edu.cn)).

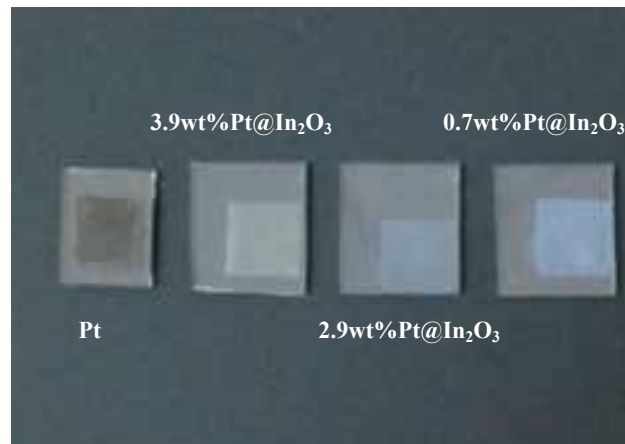

**Fig. S1.** Digital images of 3.9wt%Pt@In<sub>2</sub>O<sub>3</sub>, 2.9wt%Pt@In<sub>2</sub>O<sub>3</sub>, 0.7wt%Pt@In<sub>2</sub>O<sub>3</sub>, and commonly used Pt on FTO

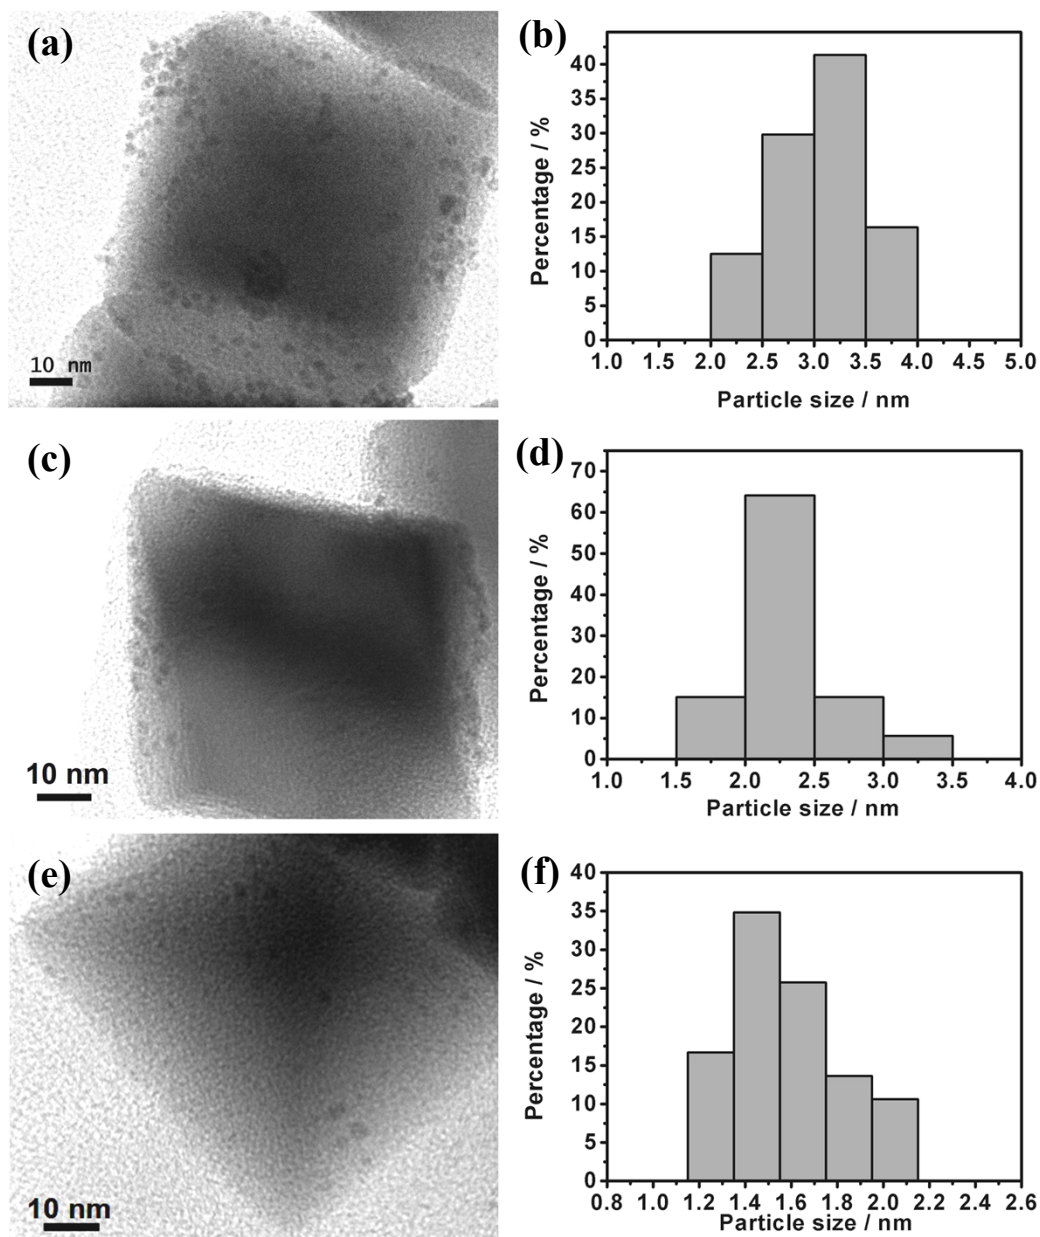

**Fig. S2.** TEM images and Histogram showing Pt nanoparticle size distributions of the synthesized 3.9wt%Pt@In<sub>2</sub>O<sub>3</sub> (a, b), 2.9wt%Pt@In<sub>2</sub>O<sub>3</sub> (c, d) and 0.7wt%Pt@In<sub>2</sub>O<sub>3</sub> (e, f) samples, respectively.

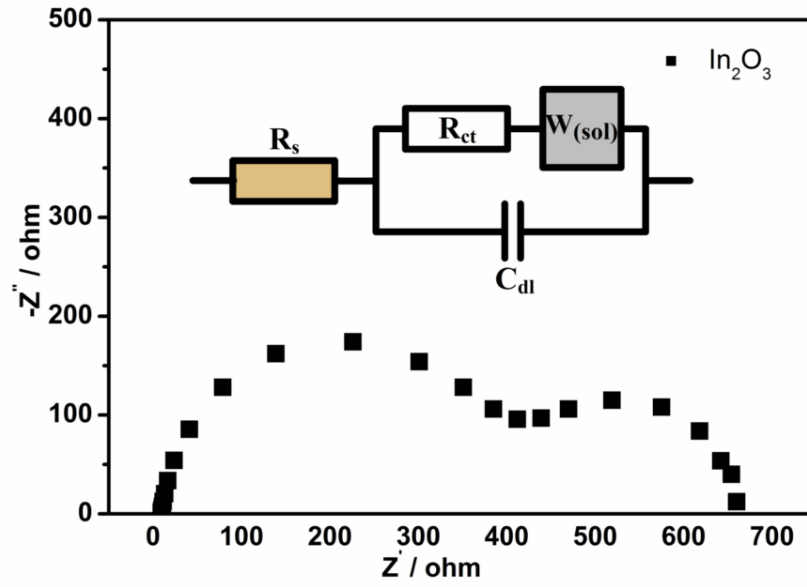

**Fig. S3.** Electrochemical impedance spectra of the symmetrical cells fabricated with two identical  $\text{In}_2\text{O}_3$  nanooctahedrons electrodes, and the insert gives the equivalent circuit.
